# Supplementary material for: The human CD5L/AIM-CD36 axis: A novel autophagy inducer in macrophages that modulates inflammatory responses
Source: PubMed Central journal article supplement — Autophagy. 2015 Feb 25;11(3):487–502. doi: 10.1080/15548627.2015.1017183 (PMC4502645; doi:10.1080/15548627.2015.1017183), 2015-02-25
Supplement: kaup-11-03-1017183-s001.pdf [file kaup-11-03-1017183-s001.pdf]

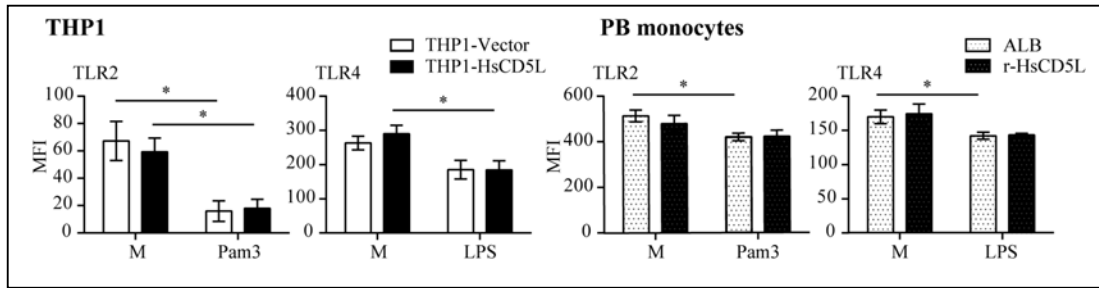

**Figure S1.** CD5L does not modulate TLR cell surface expression or internalization. Cells were stimulated with 1  $\mu$ g/ml of Pam3CSK4 or LPS for 2 h. TLR2 and TLR4 cell surface expression was then analyzed by flow cytometry. Results are expressed as median fluorescence intensity (MFI).  $*P \leq 0.05$  Student t test. Data show the mean values  $\pm$  SEM from four independent experiments (for THP1 M $\Phi$ ) or 3 blood donors (for PB monocytes). M are untreated cells (left in culture medium).

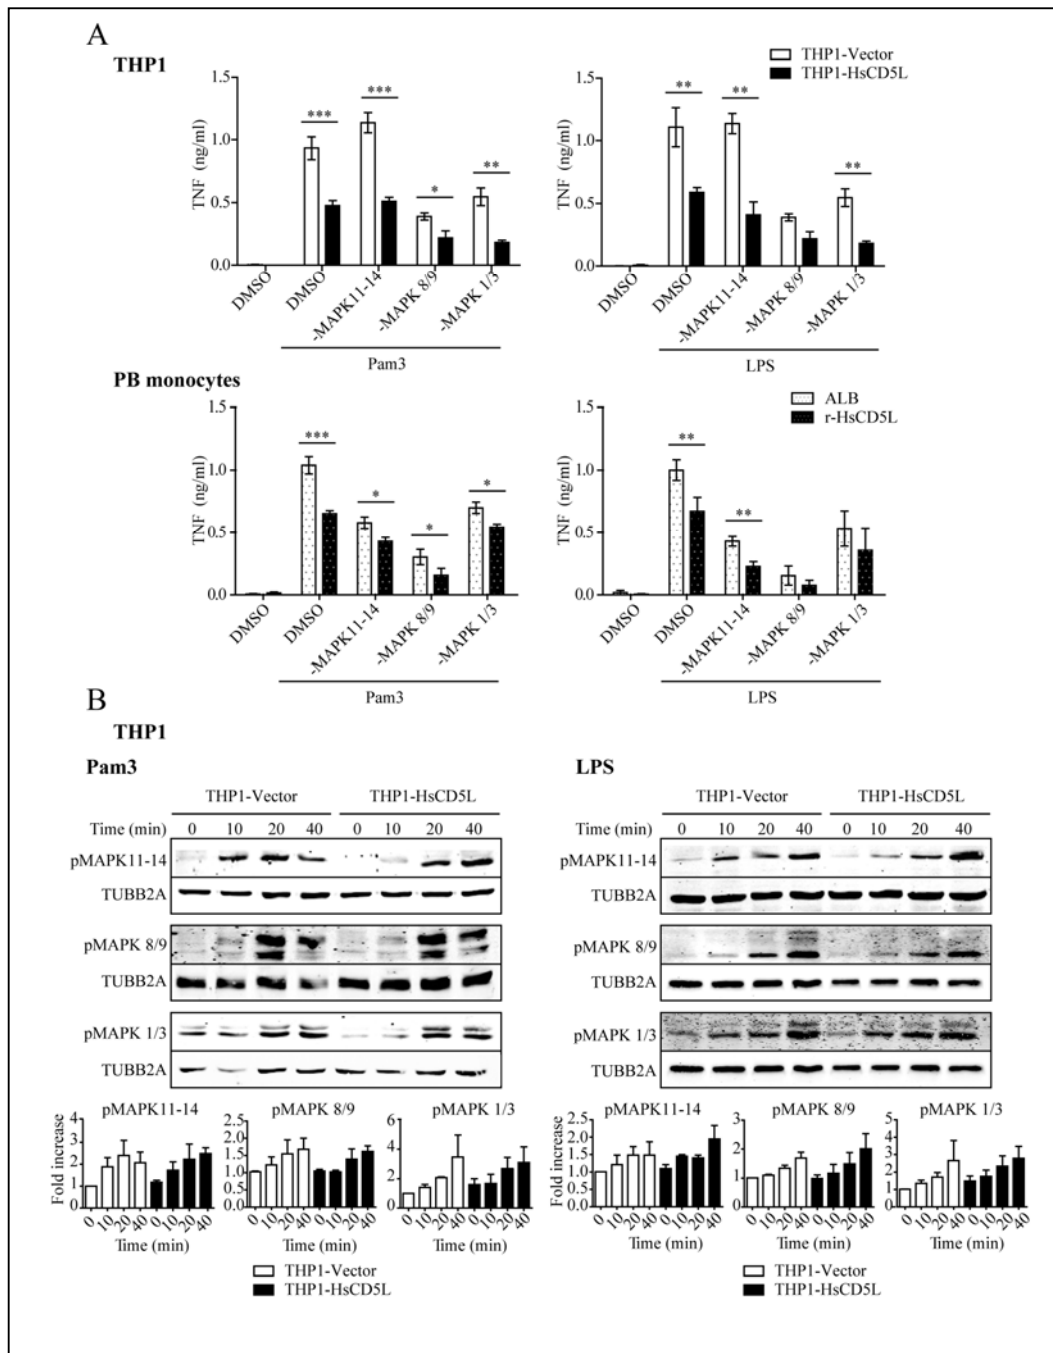

**Figure S2.** CD5L does not influence TLR-induced MAPK signaling. (A) (top) PMA-differentiated THP1-Vector (white boxes) and THP1-HsCD5L (black boxes) MΦ and (bottom) PB monocytes incubated for 24 h with 1 μg/ml ALB (white-dotted boxes) or 1 μg/ml r-HsCD5L (black-dotted boxes) were treated for 45 min with specific MAPK inhibitors at the following concentrations: 20 μM SB203580 (MAPK11/12/13/14 inhibitor), 50 μM SP600125 (MAPK8/9 inhibitor), 100 μM PD98059 (MAP2K1/2 inhibitor), or DMSO as a control. Cells were then stimulated with 100 ng/ml

Pam3CSK4 (*left*) or LPS (*right*) for 4 h. Culture supernatant fractions were collected, and the amount of TNF was measured by ELISA. Data show the mean  $\pm$  SEM from 3 independent experiments (for THP1 M $\Phi$ ) or 3 blood donors (for PB monocytes) performed in triplicate. \* $P \leq 0.05$ ; \*\* $P \leq 0.01$ ; \*\*\* $P \leq 0.001$  Student t test. **(B)** PMA-differentiated THP1-Vector (white boxes) and THP1-HsCD5L (black boxes) M $\Phi$  were stimulated for the indicated times with 0.5  $\mu\text{g/ml}$  of Pam3CSK4 (*left*) or LPS (*right*), lysed, and probed in western blots with antibodies specific to phosphorylated MAPKs and TUBB2A. Upper panel: Western blot images of a single experiment. Lower panel: Mean of protein signal intensities  $\pm$  SEM of 3 independent experiments. Fold increase is relative to THP1-Vector M $\Phi$  at time 0 after normalization with the loading control protein TUBB2A.
